# Supplementary material
Source: publisher figshare collection journal article supplement (https://gsapubs.figshare.com/ndownloader/files/23304026)
Supplement: Supplementary file 1 [file 23304026]

GSA Data Repository Item 2017142

Sirota, I., Enzel, Y., and Lensky, N.G., 2017, Temperature seasonality control modern halite layers in the Dead Sea: In situ observations: GSA Bulletin, doi:10.1130/B31661.1.

## **DATA REPOSITORY TABLES**

Supplementary Video A. A video presents settling of fine halite crystals, which nucleate along the water column and settled to the lake floor.

Supplementary Video B. A video presents formation of halite on the brine surface in a flat shape, thus called “halite rafts”. At a critical size these "halite rafts" sink to the lake floor. They are rarely found among the sediments.
